# Supplementary material
Source: PubMed Central journal article supplement (PMC2538833)
Supplement: 2008.152314_1.pdf [file 2008.152314_1.pdf]

**A**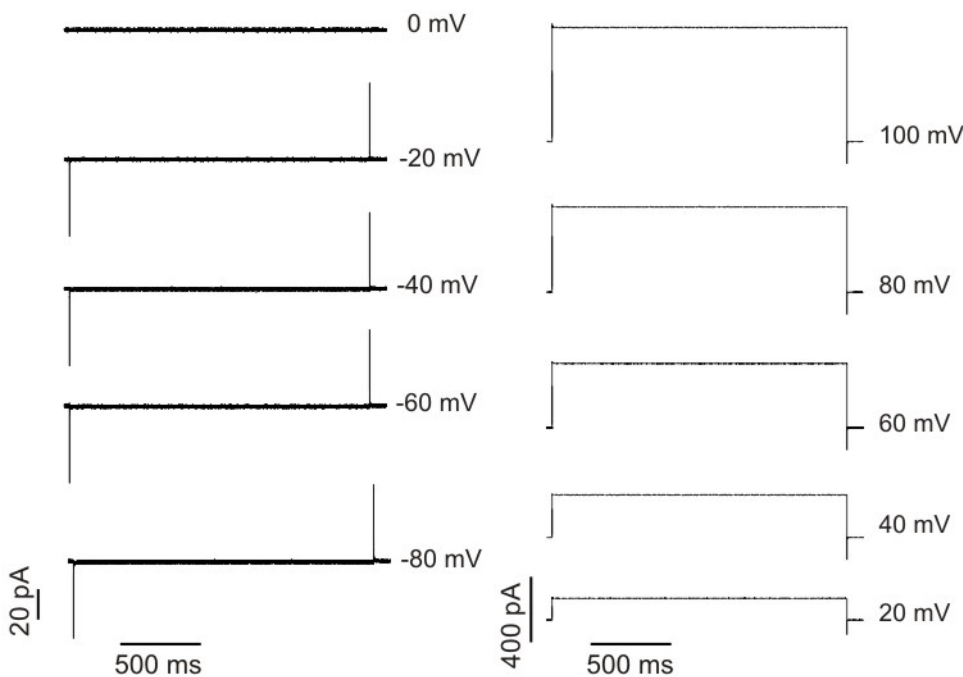**B**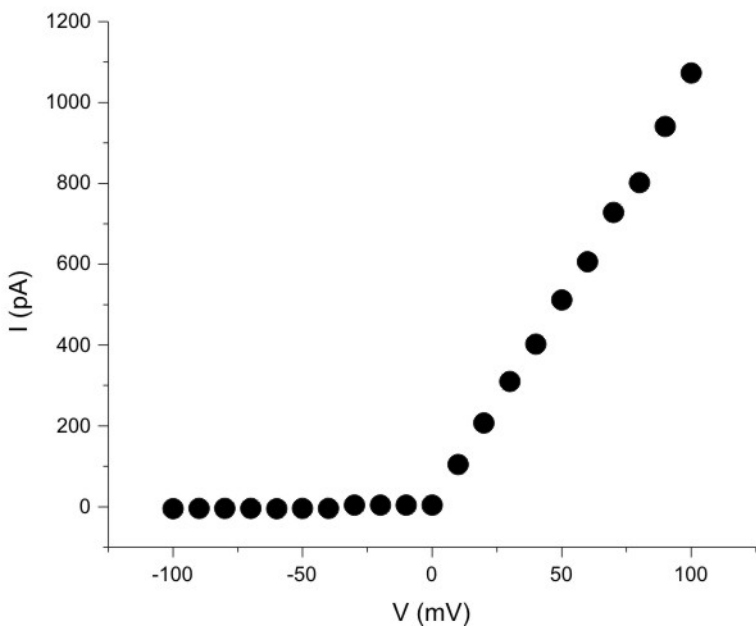

Supplemental Figure 1. **Extended IV relationship in DT40-3KO cells.** Currents were recorded following pulses to the indicated potentials. A. shows representative sweeps typical of those seen in five individual cells. At negative potentials no current activity is recorded. A large conductance is observed at positive potentials. Note differences in scales for traces at negative and positive potentials.
